# Supplementary material for: Whole genome sequencing of Borrelia miyamotoi isolate Izh-4: reference for a complex bacterial genome
Source: BMC Genomics. 2020 Jan 6;21:16. doi: 10.1186/s12864-019-6388-4 (PMC6945570; doi:10.1186/s12864-019-6388-4)
Supplement: Supplementary file 1 — Additional file 1: Table S1. Strains used in this study with NCBI Biosample accession numbers. [file 12864_2019_6388_MOESM1_ESM.xlsx]

## Sheet: Strains used
	Supplementary materials
	Supplementary Table 1. Strains used in this study with NCBI Biosample accession numbers
	(Isolates SZ, NMJW1 and BgVir, which are named in NCBI as B. garinii, are in actual fact B. bavariensis)
NCBI Biosample ID	Name of strain	Species	Geographical region of isolation	Vector	Source	Collection date
SAMN02603021	HLJ01	B. afzelii	Heilongjiang, China		H. sapiens	2012
SAMN02378865	Tom3107	B. afzelii	Siberia	Ixodes persulcatus	tick	2007
SAMN03024677	K78	B. afzelii	Austria		H. sapiens
SAMN02604205	PKo	B. afzelii	Germany		H. sapiens	1984
SAMN02436235	ACA-1	B. afzelii	Sweden		H. sapiens, skin
SAMN03081464	BA2	B. anserina	USA		domestic chicken
SAMN02603240	PBi	B. bavariensis	Germany		H. sapiens	1984
SAMN02603389	BgVir	B. bavariensis	Tomsk, Russia	Ixodes sp.	tick	1999
SAMN02402355	SZ	B. bavariensis	Heilongjiang, China		unknown	2014
SAMN02603884	NMJW1	B. bavariensis	Inner Mongolia, China	Ixodes persulcatus	tick	2012
SAMN02604204	DN127	B. bissettii	California, USA	Ixodes pacificus	tick	1985
SAMN02603966	B31	B. burgdorferi	New York, USA	Ixodes scapularis	tick	1981
SAMN03166165	VA1	B. chilensis	Chile	Ixodes stilesi	tick	2011
SAMN03081463	Co53	B. coriaceae	USA	Onrithodoros coriaceus	tick	1985
SAMN02604274	Achema	B. crocidurae	Mauritania	Ornithodoros sonrai	tick	2012
SAMN03081453	DOU	B. crocidurae	Mali	Ornithodoros sonrai	blood of a laboratory mouse
SAMN02603585	Ly	B. duttonii	Tanzania		H. sapiens, CSF	2008
SAMN02436286	SV1	B. finlandensis	Finland
SAMN02436232	PBr	B. garinii	Germany		H. sapiens, CSF	1985
SAMN02436278	Far04	B. garinii	Faroe Islands		Fratercula arctica, puffin blood	1999
SAMN05941958	CIP 103362	B. garinii	Paris, France
SAMN03081461	MTW	B. hermsii	USA
SAMN03081462	YBT	B. hermsii	USA
SAMN03408291	CC1	B. hermsii	California, USA
SAMN02641559	DAH	B. hermsii	Washington, USA
SAMN04544264	DAH-2E7	B. hermsii	USA, Spokane
SAMN03081451	YOR	B. hermsii	USA
SAMN02471307	CRI Bhis_2562	B. hispanica	Morocco	Ornithodoros erraticus	tick	1989
SAMN04979181	MN14-1420	B. mayonii	Minnesota, USA
SAMN03255733	CT14D4	B. miyamotoi	Connecticut, USA	I. scapularis?	H. sapiens, blood	2014
SAMN03081452	FR64b	B. miyamotoi	Japan	I. persulcatus?	Apodemus argenteus	1992
SAMN04455594	CT13-2396	B. miyamotoi	Connecticut, USA	I. scapularis	tick	2013
SAMN02604147	LB2001	B. miyamotoi	Connecticut, USA	I. scapularis	tick	2001
SAMN07205076	CA17-2241	B. miyamotoi	California, USA	I. pacificus	tick	2015
SAMN07572561	Izh-4	B. miyamotoi	Izhevsk, Russia	I. persulcatus?	H. sapiens, blood	Jun-2016
SAMN07572562	Izh-5	B. miyamotoi	Izhevsk, Russia	I. persulcatus?	H. sapiens, blood	Jun-2016
SAMN07572563	Izh-14	B. miyamotoi	Izhevsk, Russia	I. persulcatus?	H. sapiens, blood	Jul-2016
SAMN07572564	Izh-16	B. miyamotoi	Izhevsk, Russia	I. persulcatus?	H. sapiens, blood	Jul-2016
SAMN07572565	Yekat-1	B. miyamotoi	Yekaterinburg, Russia	I. persulcatus?	H. sapiens, blood	Jun-2016
SAMN07572566	Yekat-6	B. miyamotoi	Yekaterinburg, Russia	I. persulcatus?	H. sapiens, blood	Jul-2016
SAMN02641595	HR1	B. parkeri	California, USA
SAMN03081465	SLO	B. parkeri	USA		animal host	2009
SAMN02471306	No12 Bp1182	B. persica	Khiva, Uzbekistan	Ornithodoros papillipes	tick	1988
SAMN02603586	A1	B. recurrentis	Ethiopia		H. sapiens	2008
SAMN02436233	A14S	B. spielmanii	The Netherlands		H. sapiens, skin	1992
SAMN07807165	Bc-F10-1268	Candidatus B. tachyglossi	Queensland, Australia		tick removed while feeding from Echidna (Tachyglossi aculeatus)	2014
SAMN08918700	IST7	B. turcica	Turkey		Hyalomma aegyptium	2000
SAMN02603508	91_E135	B. turicatae	Texas, USA		tick	1996
SAMN04695901	BTE5EL	B. turicatae	Texas, USA			2015
SAMN02374895	Tom4006	B. valaisiana	Tomsk, Russia	Ixodes sp.	tick	2006
SAMN02436326	VS116	B. valaisiana	Switzerland	Ixodes ricinus	tick
